# Supplementary material for: Synergistic Autophagy Effect of miR-212-3p in Zoledronic Acid-Treated In Vitro and Orthotopic In Vivo Models and in Patient-Derived Osteosarcoma Cells
Source: MDPI journal article supplement (doi:10.3390/cancers11111812), 2019-11-18
Supplement: s1 [file s1]

## Supplementary Materials

# Synergistic Autophagy Effect of miR-212-3p in Zoledronic Acid-treated in Vitro and Orthotopic in Vivo Models and in Patient-derived Osteosarcoma Cells

Ju Yeon Oh, Eun Ho Kim, Yeon-Joo Lee, Sei Sai, Sun Ha Lim, Jang Woo Park, Hye Kyung Chung, Joon Kim, Guillaume Vares, Akihisa Takahashi, Youn Kyoung Jeong, Mi-Sook Kim and Chang-Bae Kong

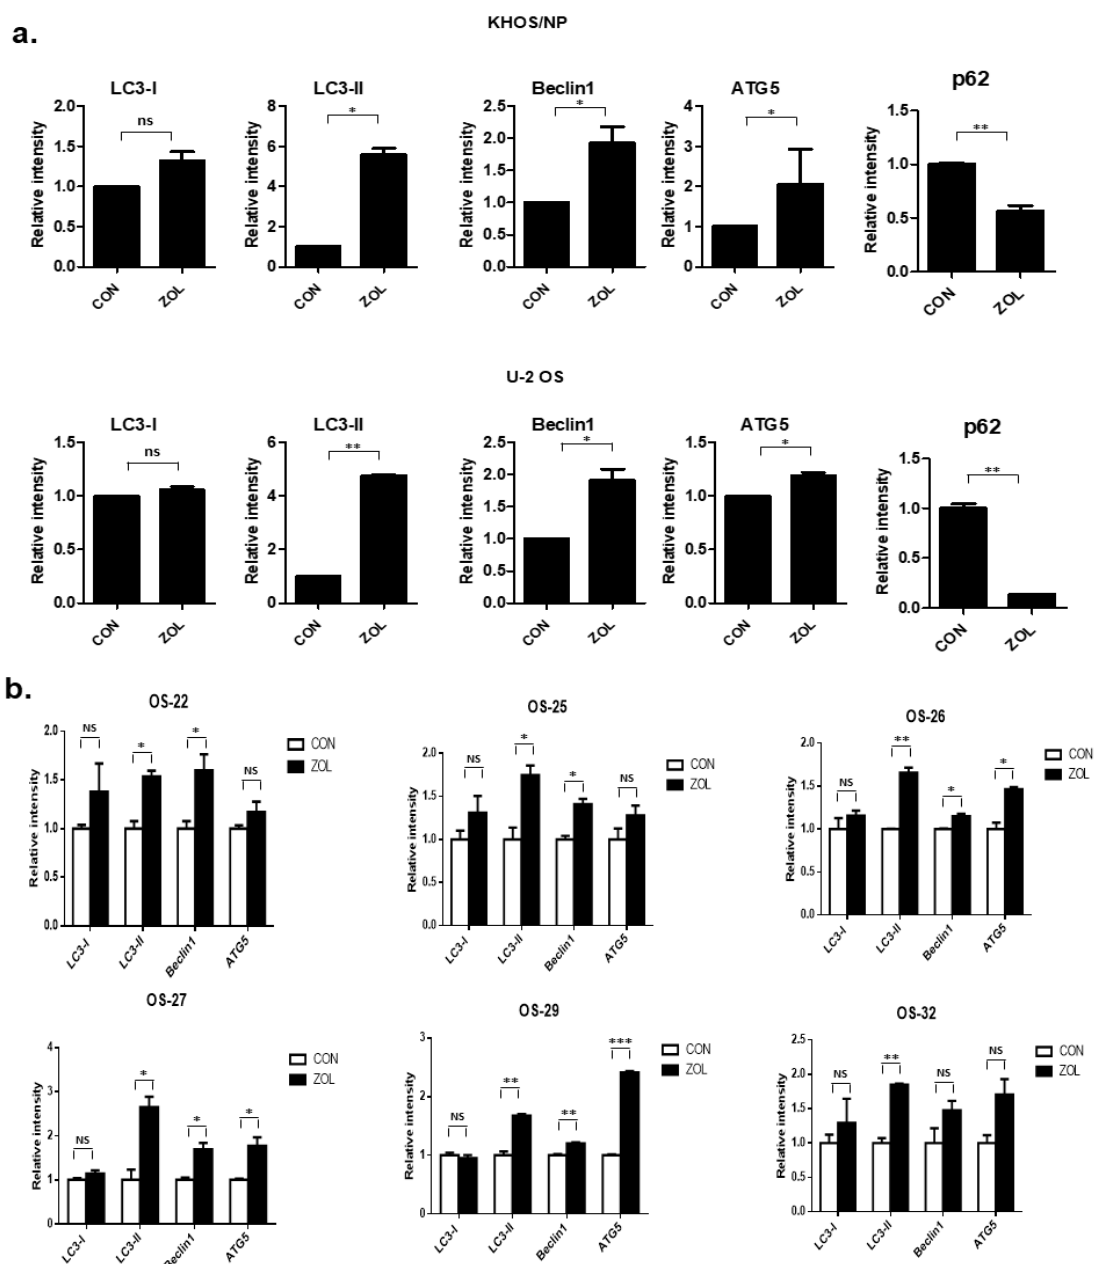

**Figure S1.** Band intensities for target proteins were normalized to that for  $\beta$ -actin. (a,b) Band intensities for target proteins were normalized to that for  $\beta$ -actin. Values represent the means of 3 experiments  $\pm$  SD; \* $p < 0.05$ , \*\* $p < 0.001$ .

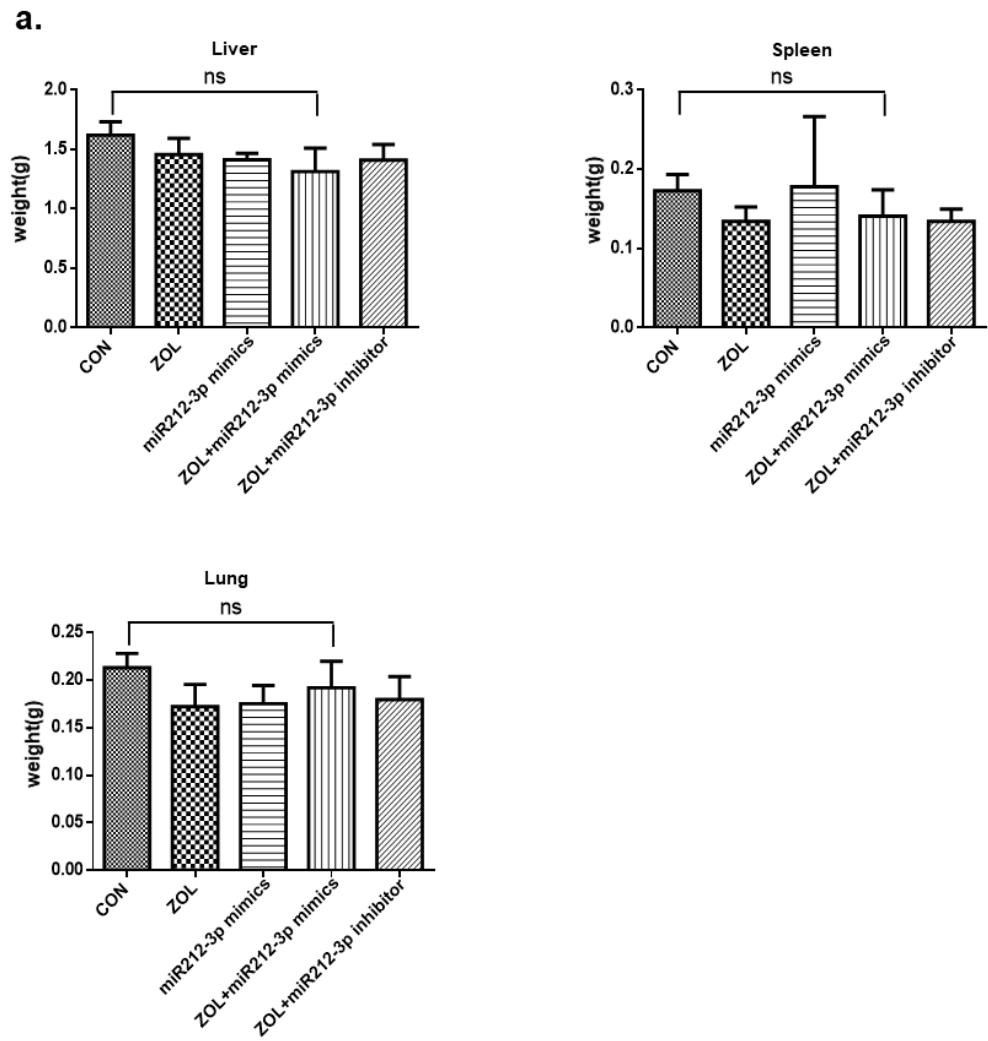

**Figure S2.** Spleen, liver and lung of mice were excised and weighed. (a) Spleen, liver and lung of mice were excised and weighed at the end of the experiment (28 days) for control, ZOL, miR212-3p mimics, ZOL+ miR212 mimics, and ZOL+ miR212 inhibitor; ns > 0.05.

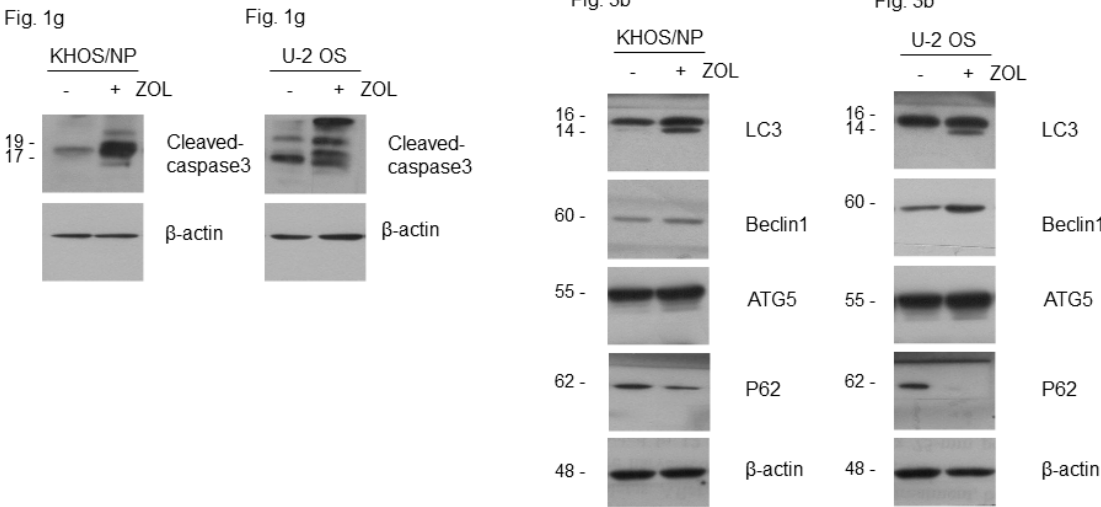

Fig. 3d

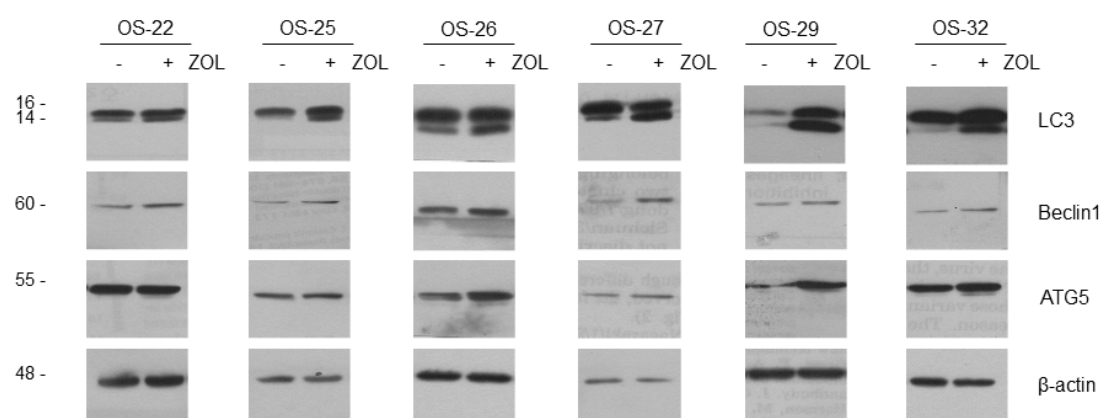

Fig. 4a

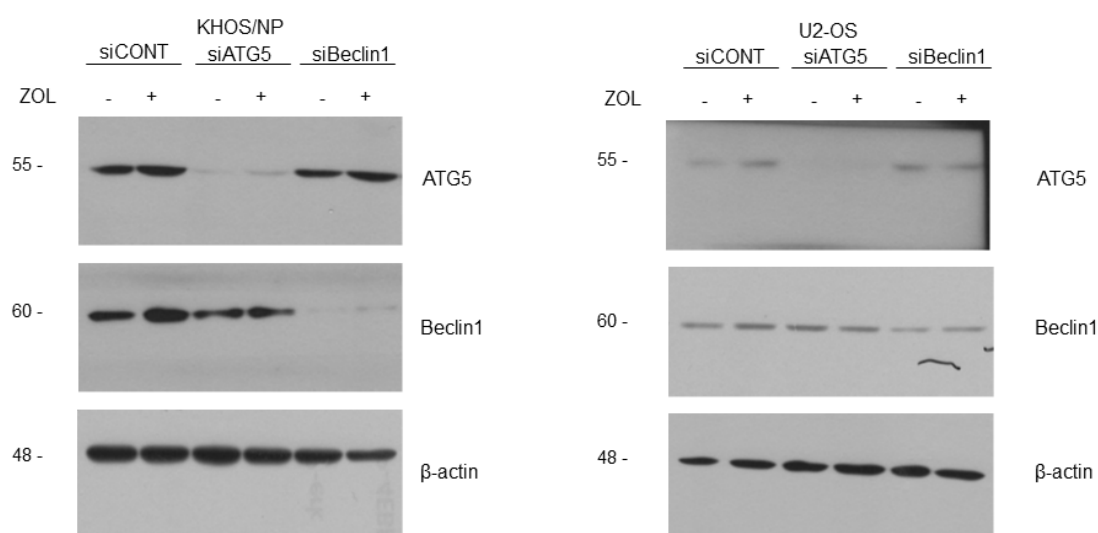

Fig. 5a

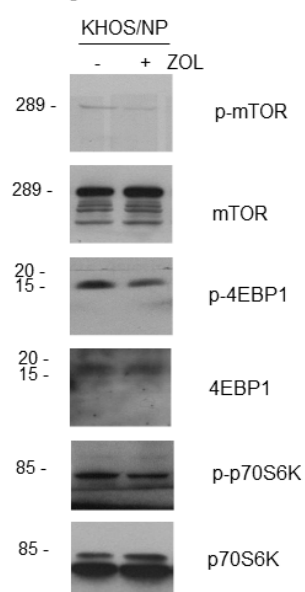

Fig. 5a

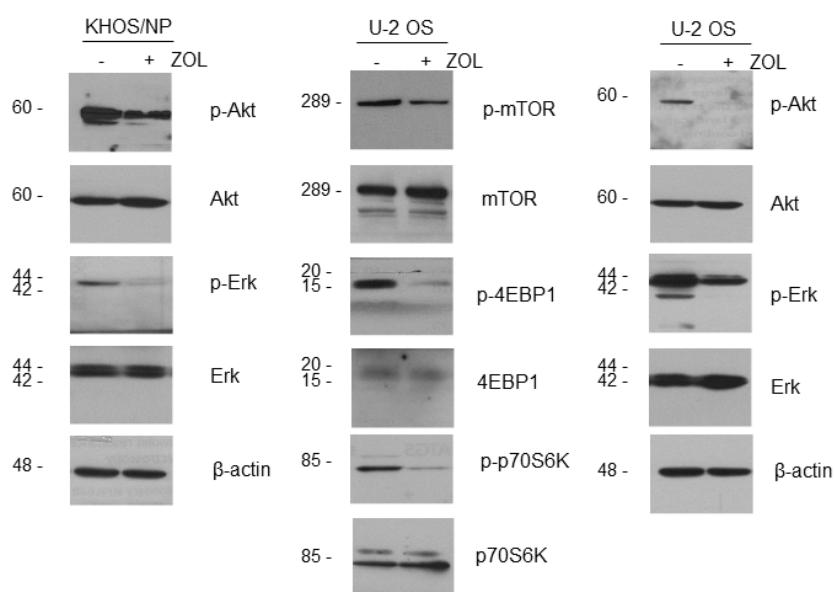

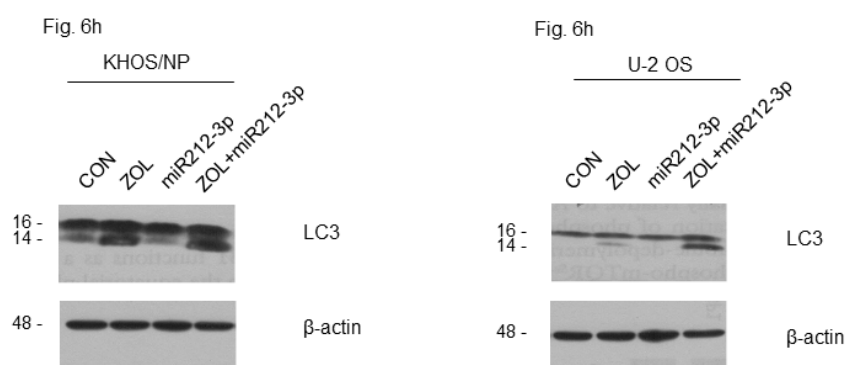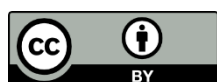

© 2019 by the authors. Licensee MDPI, Basel, Switzerland. This article is an open access article distributed under the terms and conditions of the Creative Commons Attribution (CC BY) license (<http://creativecommons.org/licenses/by/4.0/>).
